# Supplementary material for: Understanding Continued Use Intention of Digital Intangible Cultural Heritage Games Through the SOR Model
Source: Research Square preprint supplement (doi:10.21203/rs.3.rs-5709371/v1), 2025-04-22
Supplement: Supplementary file 2 [file 2cf1fc2575a5a0511f8bc3e8.pdf]

## Measure of scales

| Subscales                                                                                                            | Sources                  |
|----------------------------------------------------------------------------------------------------------------------|--------------------------|
| <b>Information Quality (IQ)</b>                                                                                      | Adapted from Gao et al.  |
| IQ1.MOP provides me with relevant traditional pottery-making information to my needs.                                | (2014)                   |
| IQ2. MOP provides me with sufficient traditional pottery-making information.                                         |                          |
| IQ3. MOP provides me with accurate traditional pottery-making information.                                           |                          |
| IQ4. MOP provides me with up-to-date traditional pottery-making information                                          |                          |
| <b>System Quality (SQ)</b>                                                                                           | Adapted from Gao et al.  |
| SQ1.MOP quickly loads all the text and graphics.                                                                     | (2014)                   |
| SQ2.MOP is easy to get start with.                                                                                   |                          |
| SQ3.MOP is visually attractive.                                                                                      |                          |
| SQ4. I could conduct traditional pottery-making on MOP at anytime, anywhere I want.                                  |                          |
| <b>Critical Mass (CM)</b>                                                                                            | Adapted from Yoon et al. |
| CM1.MOP is enjoyed by many people.                                                                                   | (2013)                   |
| CM2.MOP is a popular topic among many people.                                                                        |                          |
| CM3.MOP is well-known to many people.                                                                                |                          |
| CM4. My friends and colleagues are aware of MOP.                                                                     |                          |
| <b>Social Interaction (SI)</b>                                                                                       | Adapted from Choi &      |
| SI. I enjoy interacting with the friends I make while playing MOP.                                                   | Kim (2004) and M. Lee    |
| SI2. Communicating with others is useful for playing MOP.                                                            | (2009)                   |
| SI3. Communicating with others makes MOP more enjoyable.                                                             |                          |
| <b>Utilitarian Performance Confirmation (UPC)</b>                                                                    | Adapted from Abbasi et   |
| UPC1. I find MOP is more useful for learning traditional pottery-making than I initially expected.                   | al. (2024)               |
| UPC2. I find MOP enable traditional pottery-making learning more quickly and conveniently than I initially expected. |                          |
| UPC3. I find MOP enable me to reduce the cost of learning traditional non-heritage than I initially expected.        |                          |
| <b>Hedonic Performance Confirmation (HPC)</b>                                                                        | Adapted from Abbasi et   |
| HPC1. Using MOP is more fun than I initially expected.                                                               | al. (2024)               |
| HPC2. Actual process of using MOP is more pleasant than I initially expected.                                        |                          |
| HPC3. Learning traditional pottery-making by MOP is more enjoyable than I initially expected.                        |                          |
| <b>Cultural Identity (CI)</b>                                                                                        | Adapted from Chan et     |
| CI1. I have a strong curiosity about this intangible cultural heritage.                                              | al.(2023)                |
| CI2. I have an inexplicable sense intimacy with elements of this intangible cultural heritage.                       |                          |
| CI3. I like spending time on learning about this intangible cultural heritage.                                       |                          |
| <b>Value co-creation (VOC)</b>                                                                                       | Adapted from Hu et al.   |
| VOC1. I enjoyed the co-creation from the interaction with game elements.                                             | (2024)                   |
| VOC2. I find MOP enable me to realise self-creativity.                                                               |                          |
| VOC3. The game allowed me to co-create and disseminate cultural values effectively.                                  |                          |
| <b>Continuous intention (INT)</b>                                                                                    | Adapted from Lee and     |

---

INT1. If I have time, I would like to play this game again.

Tsai (2010)

INT2. I would like to find more time to play this game in order to learn more.

INT3. I will recommend my friends to play this game with me.

---
